# Supplementary material for: Relevance Epistasis Network of Gastritis for Intra-chromosomes in the Korea Associated Resource (KARE) Cohort Study
Source: PubMed Central journal article supplement — Genomics Inform. 2014 Dec 31;12(4):216–24. doi: 10.5808/GI.2014.12.4.216 (PMC4330257; doi:10.5808/gi.2014.12.4.216), 2014-12-31
Supplement: gni-12-216-s001.pdf [file gni-12-216-s001.pdf]

**SUPPLEMENTARY INFORMATION**

**Relevance Epistasis Network of Gastritis for Intra-chromosomes in the KARE Cohort Study**

**Hyun-hwan Jeong, Kyung-Ah Sohn\***

Department of Information and Computer Engineering, Ajou University, Suwon 443-749, Korea

**Supplementary Table 1.** List of significant SNP pairs and their p-values

| Chromosome | Loci       |            | M.I.   | p-value  |
|------------|------------|------------|--------|----------|
| 1          | rs16859942 | rs16833167 | 0.0115 | 4.36E-02 |
| 1          | rs16859942 | rs2104927  | 0.0115 | 4.62E-02 |
| 2          | rs41419446 | rs17654413 | 0.0125 | 4.27E-03 |
| 2          | rs6729316  | rs4629147  | 0.0125 | 4.86E-03 |
| 2          | rs1026992  | rs826129   | 0.0119 | 1.91E-02 |
| 2          | rs6729316  | rs16865783 | 0.0118 | 2.58E-02 |
| 2          | rs6729316  | rs11124220 | 0.0117 | 2.88E-02 |
| 2          | rs6729316  | rs2975788  | 0.0116 | 3.69E-02 |
| 3          | rs17670486 | rs12489012 | 0.0116 | 2.80E-02 |
| 3          | rs17248901 | rs6799941  | 0.0114 | 4.87E-02 |
| 6          | rs243131   | rs10484725 | 0.0125 | 3.03E-03 |
| 6          | rs16877530 | rs6455943  | 0.0124 | 4.14E-03 |
| 6          | rs16877530 | rs3804498  | 0.0123 | 5.23E-03 |
| 6          | rs243131   | rs6917401  | 0.0122 | 6.66E-03 |
| 6          | rs7739767  | rs10485258 | 0.0118 | 1.42E-02 |
| 6          | rs243131   | rs3942865  | 0.0118 | 1.50E-02 |
| 6          | rs243131   | rs12194557 | 0.0117 | 2.06E-02 |
| 6          | rs16877530 | rs9321365  | 0.0117 | 2.18E-02 |
| 6          | rs16877530 | rs2322747  | 0.0115 | 2.81E-02 |
| 6          | rs3799853  | rs12526105 | 0.0115 | 2.84E-02 |
| 7          | rs17427703 | rs10953881 | 0.0132 | 3.98E-04 |
| 9          | rs169730   | rs1331247  | 0.0137 | 1.04E-04 |
| 9          | rs169730   | rs17352208 | 0.0135 | 1.78E-04 |
| 9          | rs169730   | rs4073871  | 0.0131 | 4.57E-04 |
| 9          | rs2151065  | rs1999368  | 0.0127 | 1.14E-03 |
| 9          | rs2025167  | rs17789358 | 0.0125 | 1.77E-03 |
| 9          | rs169730   | rs10989904 | 0.0125 | 1.84E-03 |
| 9          | rs1487508  | rs17800716 | 0.0124 | 2.48E-03 |
| 9          | rs169730   | rs10813746 | 0.0123 | 2.90E-03 |
| 9          | rs169730   | rs17055851 | 0.0123 | 3.03E-03 |
| 9          | rs7859893  | rs575107   | 0.0122 | 3.46E-03 |
| 9          | rs1260460  | rs2275888  | 0.0122 | 3.83E-03 |
| 9          | rs7859237  | rs7039577  | 0.0121 | 4.47E-03 |
| 9          | rs169730   | rs7871055  | 0.0121 | 4.75E-03 |
| 9          | rs169730   | rs7870807  | 0.0121 | 4.78E-03 |
| 9          | rs169730   | rs3126950  | 0.0121 | 5.05E-03 |
| 9          | rs17347542 | rs7020658  | 0.0120 | 6.45E-03 |
| 9          | rs169730   | rs10813879 | 0.0120 | 6.52E-03 |
| 9          | rs4130867  | rs10991808 | 0.0120 | 6.52E-03 |

|   |            |            |        |          |
|---|------------|------------|--------|----------|
| 9 | rs11142815 | rs2900469  | 0.0119 | 6.74E-03 |
| 9 | rs169730   | rs2224447  | 0.0119 | 7.24E-03 |
| 9 | rs169730   | rs7048595  | 0.0119 | 7.40E-03 |
| 9 | rs169730   | rs1889010  | 0.0119 | 7.79E-03 |
| 9 | rs17061485 | rs2779724  | 0.0119 | 7.83E-03 |
| 9 | rs169730   | rs4487842  | 0.0119 | 7.87E-03 |
| 9 | rs169730   | rs10119786 | 0.0119 | 7.89E-03 |
| 9 | rs169730   | rs10756320 | 0.0119 | 8.09E-03 |
| 9 | rs169730   | rs1318664  | 0.0119 | 8.23E-03 |
| 9 | rs169730   | rs4297092  | 0.0118 | 8.59E-03 |
| 9 | rs169730   | rs10817405 | 0.0118 | 8.61E-03 |
| 9 | rs169730   | rs11140349 | 0.0118 | 8.94E-03 |
| 9 | rs169730   | rs657964   | 0.0118 | 9.09E-03 |
| 9 | rs169730   | rs2674087  | 0.0118 | 9.15E-03 |
| 9 | rs9697131  | rs11790517 | 0.0118 | 9.69E-03 |
| 9 | rs169730   | rs7027121  | 0.0118 | 1.02E-02 |
| 9 | rs13301071 | rs16931907 | 0.0117 | 1.12E-02 |
| 9 | rs4877599  | rs10761082 | 0.0117 | 1.26E-02 |
| 9 | rs169730   | rs1930790  | 0.0116 | 1.35E-02 |
| 9 | rs169730   | rs17351637 | 0.0116 | 1.36E-02 |
| 9 | rs169730   | rs1339248  | 0.0116 | 1.39E-02 |
| 9 | rs10959917 | rs10869137 | 0.0116 | 1.45E-02 |
| 9 | rs9314750  | rs7853594  | 0.0116 | 1.45E-02 |
| 9 | rs169730   | rs563805   | 0.0116 | 1.46E-02 |
| 9 | rs169730   | rs10981674 | 0.0116 | 1.50E-02 |
| 9 | rs10965244 | rs10858231 | 0.0116 | 1.51E-02 |
| 9 | rs1327489  | rs2297533  | 0.0116 | 1.54E-02 |
| 9 | rs10511575 | rs1029034  | 0.0116 | 1.55E-02 |
| 9 | rs169730   | rs11789717 | 0.0116 | 1.57E-02 |
| 9 | rs169730   | rs13285155 | 0.0116 | 1.58E-02 |
| 9 | rs169730   | rs12379369 | 0.0116 | 1.62E-02 |
| 9 | rs2031195  | rs7862812  | 0.0116 | 1.63E-02 |
| 9 | rs13286966 | rs10869463 | 0.0115 | 1.77E-02 |
| 9 | rs169730   | rs2251622  | 0.0115 | 1.79E-02 |
| 9 | rs169730   | rs7047070  | 0.0115 | 1.79E-02 |
| 9 | rs169730   | rs9299353  | 0.0115 | 1.79E-02 |
| 9 | rs169730   | rs2031195  | 0.0115 | 1.80E-02 |
| 9 | rs10964337 | rs16907685 | 0.0115 | 1.87E-02 |
| 9 | rs7027647  | rs10435850 | 0.0115 | 2.02E-02 |
| 9 | rs169730   | rs7041124  | 0.0115 | 2.04E-02 |
| 9 | rs169730   | rs4422822  | 0.0115 | 2.07E-02 |
| 9 | rs10976937 | rs10987290 | 0.0115 | 2.09E-02 |

|   |            |            |        |          |
|---|------------|------------|--------|----------|
| 9 | rs12551707 | rs638541   | 0.0114 | 2.15E-02 |
| 9 | rs169730   | rs7859203  | 0.0114 | 2.20E-02 |
| 9 | rs169730   | rs13286966 | 0.0114 | 2.21E-02 |
| 9 | rs10975323 | rs569434   | 0.0114 | 2.22E-02 |
| 9 | rs169730   | rs12000170 | 0.0114 | 2.25E-02 |
| 9 | rs2485157  | rs3739929  | 0.0114 | 2.32E-02 |
| 9 | rs169730   | rs7019482  | 0.0114 | 2.45E-02 |
| 9 | rs13287547 | rs9314750  | 0.0114 | 2.45E-02 |
| 9 | rs2113939  | rs10983685 | 0.0114 | 2.51E-02 |
| 9 | rs169730   | rs4454352  | 0.0114 | 2.59E-02 |
| 9 | rs169730   | rs7030906  | 0.0114 | 2.61E-02 |
| 9 | rs17287864 | rs7019068  | 0.0114 | 2.67E-02 |
| 9 | rs169730   | rs902923   | 0.0114 | 2.69E-02 |
| 9 | rs10780261 | rs10982516 | 0.0113 | 2.73E-02 |
| 9 | rs169730   | rs12551478 | 0.0113 | 2.74E-02 |
| 9 | rs12001366 | rs10759734 | 0.0113 | 2.74E-02 |
| 9 | rs10974334 | rs1411792  | 0.0113 | 2.84E-02 |
| 9 | rs9694997  | rs2756912  | 0.0113 | 2.84E-02 |
| 9 | rs10962814 | rs34971054 | 0.0113 | 2.85E-02 |
| 9 | rs169730   | rs7044513  | 0.0113 | 2.95E-02 |
| 9 | rs12551465 | rs16908259 | 0.0113 | 3.06E-02 |
| 9 | rs169730   | rs7859237  | 0.0113 | 3.06E-02 |
| 9 | rs169730   | rs6560319  | 0.0113 | 3.10E-02 |
| 9 | rs169730   | rs10759821 | 0.0113 | 3.10E-02 |
| 9 | rs2251622  | rs41529151 | 0.0113 | 3.11E-02 |
| 9 | rs169730   | rs10465021 | 0.0113 | 3.15E-02 |
| 9 | rs169730   | rs10969893 | 0.0113 | 3.16E-02 |
| 9 | rs169730   | rs2018717  | 0.0113 | 3.21E-02 |
| 9 | rs169730   | rs1530331  | 0.0113 | 3.27E-02 |
| 9 | rs957      | rs17394582 | 0.0113 | 3.31E-02 |
| 9 | rs16923908 | rs10858265 | 0.0112 | 3.48E-02 |
| 9 | rs169730   | rs10982235 | 0.0112 | 3.50E-02 |
| 9 | rs169730   | rs10809860 | 0.0112 | 3.54E-02 |
| 9 | rs10511437 | rs1536864  | 0.0112 | 3.60E-02 |
| 9 | rs2383046  | rs1927983  | 0.0112 | 3.61E-02 |
| 9 | rs169730   | rs514522   | 0.0112 | 3.90E-02 |
| 9 | rs7042837  | rs7039358  | 0.0112 | 3.91E-02 |
| 9 | rs169730   | rs7855444  | 0.0112 | 3.95E-02 |
| 9 | rs169730   | rs13287547 | 0.0112 | 4.01E-02 |
| 9 | rs169730   | rs12335425 | 0.0112 | 4.05E-02 |
| 9 | rs169730   | rs12001366 | 0.0112 | 4.06E-02 |
| 9 | rs2152263  | rs17051844 | 0.0112 | 4.06E-02 |

|    |            |            |        |          |
|----|------------|------------|--------|----------|
| 9  | rs169730   | rs1347791  | 0.0112 | 4.09E-02 |
| 9  | rs169730   | rs10814339 | 0.0112 | 4.13E-02 |
| 9  | rs10815985 | rs3904999  | 0.0112 | 4.14E-02 |
| 9  | rs1023087  | rs1323420  | 0.0112 | 4.18E-02 |
| 9  | rs169730   | rs11142719 | 0.0112 | 4.20E-02 |
| 9  | rs4977501  | rs10979455 | 0.0112 | 4.20E-02 |
| 9  | rs169730   | rs4978577  | 0.0112 | 4.25E-02 |
| 9  | rs1609625  | rs17053979 | 0.0112 | 4.32E-02 |
| 9  | rs169730   | rs3922982  | 0.0111 | 4.34E-02 |
| 9  | rs169730   | rs502436   | 0.0111 | 4.39E-02 |
| 9  | rs10756216 | rs7025349  | 0.0111 | 4.49E-02 |
| 9  | rs169730   | rs7863262  | 0.0111 | 4.57E-02 |
| 9  | rs10780959 | rs6559328  | 0.0111 | 4.61E-02 |
| 9  | rs10976375 | rs10985207 | 0.0111 | 4.75E-02 |
| 9  | rs7857417  | rs1074670  | 0.0111 | 4.81E-02 |
| 9  | rs169730   | rs7020290  | 0.0111 | 4.88E-02 |
| 9  | rs169730   | rs445722   | 0.0111 | 4.97E-02 |
| 11 | rs7118678  | rs4542446  | 0.0112 | 4.14E-02 |
| 14 | rs999692   | rs1959873  | 0.0126 | 6.82E-04 |
| 14 | rs2401887  | rs2296145  | 0.0119 | 3.57E-03 |
| 14 | rs2401887  | rs34854034 | 0.0116 | 7.23E-03 |
| 14 | rs2401887  | rs8012888  | 0.0112 | 1.81E-02 |
| 14 | rs17100427 | rs2895908  | 0.0109 | 3.84E-02 |
| 15 | rs493971   | rs11633819 | 0.0287 | 3.58E-21 |
| 15 | rs493971   | rs3751586  | 0.0286 | 3.97E-21 |
| 15 | rs7178255  | rs11629846 | 0.0285 | 5.60E-21 |
| 15 | rs493971   | rs11072213 | 0.0284 | 7.18E-21 |
| 15 | rs493971   | rs2086329  | 0.0278 | 2.93E-20 |
| 15 | rs493971   | rs685201   | 0.0278 | 3.49E-20 |
| 15 | rs493971   | rs1863094  | 0.0278 | 3.61E-20 |
| 15 | rs493971   | rs16975740 | 0.0277 | 3.68E-20 |
| 15 | rs493971   | rs11637631 | 0.0276 | 4.76E-20 |
| 15 | rs493971   | rs488156   | 0.0275 | 6.95E-20 |
| 15 | rs493971   | rs335789   | 0.0275 | 7.04E-20 |
| 15 | rs493971   | rs17661734 | 0.0274 | 8.34E-20 |
| 15 | rs493971   | rs16975213 | 0.0274 | 9.92E-20 |
| 15 | rs493971   | rs1919175  | 0.0272 | 1.32E-19 |
| 15 | rs493971   | rs2469149  | 0.0272 | 1.42E-19 |
| 15 | rs493971   | rs4483822  | 0.0272 | 1.50E-19 |
| 15 | rs493971   | rs11631130 | 0.0272 | 1.55E-19 |
| 15 | rs493971   | rs11855112 | 0.0272 | 1.59E-19 |
| 15 | rs493971   | rs4777568  | 0.0272 | 1.64E-19 |

|    |            |            |        |          |
|----|------------|------------|--------|----------|
| 15 | rs493971   | rs4965476  | 0.0271 | 1.85E-19 |
| 15 | rs493971   | rs2163194  | 0.0271 | 1.88E-19 |
| 15 | rs493971   | rs939590   | 0.0271 | 1.95E-19 |
| 15 | rs6576537  | rs10518833 | 0.0271 | 2.03E-19 |
| 15 | rs493971   | rs8034178  | 0.0270 | 2.34E-19 |
| 15 | rs493971   | rs7170474  | 0.0270 | 2.36E-19 |
| 15 | rs9806705  | rs7177662  | 0.0270 | 2.55E-19 |
| 15 | rs493971   | rs11071385 | 0.0270 | 2.57E-19 |
| 15 | rs493971   | rs3743261  | 0.0269 | 2.92E-19 |
| 15 | rs493971   | rs8024690  | 0.0269 | 3.16E-19 |
| 15 | rs493971   | rs9944177  | 0.0269 | 3.35E-19 |
| 15 | rs493971   | rs1364822  | 0.0268 | 3.52E-19 |
| 15 | rs493971   | rs965538   | 0.0268 | 3.68E-19 |
| 15 | rs493971   | rs12595648 | 0.0268 | 3.70E-19 |
| 15 | rs493971   | rs12915412 | 0.0268 | 3.81E-19 |
| 15 | rs493971   | rs17336789 | 0.0268 | 3.91E-19 |
| 15 | rs12916870 | rs16971340 | 0.0267 | 5.35E-19 |
| 15 | rs493971   | rs10083714 | 0.0267 | 5.35E-19 |
| 15 | rs493971   | rs1657792  | 0.0266 | 6.09E-19 |
| 15 | rs493971   | rs1648245  | 0.0266 | 6.18E-19 |
| 15 | rs493971   | rs12438157 | 0.0266 | 6.26E-19 |
| 15 | rs316611   | rs12916134 | 0.0266 | 6.42E-19 |
| 15 | rs493971   | rs301848   | 0.0266 | 6.56E-19 |
| 15 | rs493971   | rs4775177  | 0.0266 | 7.37E-19 |
| 15 | rs493971   | rs7179693  | 0.0266 | 7.38E-19 |
| 15 | rs7169431  | rs4077174  | 0.0265 | 7.53E-19 |
| 15 | rs493971   | rs12439689 | 0.0265 | 7.84E-19 |
| 15 | rs493971   | rs4777032  | 0.0265 | 8.49E-19 |
| 15 | rs493971   | rs12324744 | 0.0265 | 8.82E-19 |
| 15 | rs3751586  | rs4886707  | 0.0265 | 8.91E-19 |
| 15 | rs493971   | rs6494768  | 0.0265 | 8.98E-19 |
| 15 | rs493971   | rs2086455  | 0.0265 | 9.29E-19 |
| 15 | rs493971   | rs16977850 | 0.0265 | 9.39E-19 |
| 15 | rs493971   | rs4281685  | 0.0264 | 1.02E-18 |
| 15 | rs17303803 | rs2139952  | 0.0264 | 1.06E-18 |
| 15 | rs493971   | rs2606163  | 0.0264 | 1.12E-18 |
| 15 | rs493971   | rs16975304 | 0.0264 | 1.17E-18 |
| 15 | rs7172629  | rs2018100  | 0.0264 | 1.17E-18 |
| 15 | rs493971   | rs2970357  | 0.0264 | 1.18E-18 |
| 15 | rs4924305  | rs2552175  | 0.0264 | 1.20E-18 |
| 15 | rs17661734 | rs288438   | 0.0264 | 1.21E-18 |
| 15 | rs493971   | rs6496412  | 0.0263 | 1.23E-18 |

|    |            |            |        |          |
|----|------------|------------|--------|----------|
| 15 | rs493971   | rs1877782  | 0.0263 | 1.23E-18 |
| 15 | rs493971   | rs11858307 | 0.0263 | 1.24E-18 |
| 15 | rs493971   | rs12441657 | 0.0263 | 1.26E-18 |
| 15 | rs7403021  | rs2260971  | 0.0263 | 1.27E-18 |
| 15 | rs2412716  | rs6494849  | 0.0263 | 1.28E-18 |
| 15 | rs493971   | rs16954227 | 0.0263 | 1.30E-18 |
| 15 | rs493971   | rs873843   | 0.0263 | 1.30E-18 |
| 15 | rs493971   | rs12913742 | 0.0263 | 1.35E-18 |
| 15 | rs12442708 | rs7171279  | 0.0263 | 1.38E-18 |
| 15 | rs493971   | rs16977939 | 0.0263 | 1.41E-18 |
| 15 | rs493971   | rs12916690 | 0.0263 | 1.53E-18 |
| 15 | rs669653   | rs12441227 | 0.0263 | 1.54E-18 |
| 15 | rs17116685 | rs338342   | 0.0263 | 1.55E-18 |
| 15 | rs493971   | rs7169431  | 0.0263 | 1.56E-18 |
| 15 | rs493971   | rs2347450  | 0.0262 | 1.58E-18 |
| 15 | rs16954227 | rs2839734  | 0.0262 | 1.62E-18 |
| 15 | rs493971   | rs6496029  | 0.0262 | 1.62E-18 |
| 15 | rs493971   | rs1551991  | 0.0262 | 1.66E-18 |
| 15 | rs493971   | rs8032675  | 0.0262 | 1.69E-18 |
| 15 | rs1918646  | rs3901588  | 0.0262 | 1.70E-18 |
| 15 | rs493971   | rs2306021  | 0.0262 | 1.75E-18 |
| 15 | rs493971   | rs11636870 | 0.0262 | 1.83E-18 |
| 15 | rs493971   | rs8025438  | 0.0262 | 1.86E-18 |
| 15 | rs1440806  | rs1912     | 0.0262 | 1.87E-18 |
| 15 | rs493971   | rs7172629  | 0.0262 | 1.88E-18 |
| 15 | rs16954800 | rs1614625  | 0.0262 | 1.91E-18 |
| 15 | rs11638578 | rs2414844  | 0.0262 | 1.97E-18 |
| 15 | rs11858307 | rs16975275 | 0.0262 | 2.00E-18 |
| 15 | rs493971   | rs1371385  | 0.0261 | 2.05E-18 |
| 15 | rs493971   | rs2073987  | 0.0261 | 2.06E-18 |
| 15 | rs493971   | rs7171849  | 0.0261 | 2.07E-18 |
| 15 | rs493971   | rs304982   | 0.0261 | 2.10E-18 |
| 15 | rs493971   | rs7161806  | 0.0261 | 2.10E-18 |
| 15 | rs493971   | rs703237   | 0.0261 | 2.11E-18 |
| 15 | rs7165249  | rs16973216 | 0.0261 | 2.15E-18 |
| 15 | rs939981   | rs17191491 | 0.0261 | 2.22E-18 |
| 15 | rs6492918  | rs13380271 | 0.0261 | 2.30E-18 |
| 15 | rs493971   | rs12438071 | 0.0261 | 2.37E-18 |
| 15 | rs12916690 | rs17733968 | 0.0261 | 2.38E-18 |
| 15 | rs493971   | rs6496026  | 0.0261 | 2.44E-18 |
| 15 | rs493971   | rs288438   | 0.0261 | 2.50E-18 |
| 15 | rs493971   | rs12900029 | 0.0261 | 2.50E-18 |

|    |            |            |        |          |
|----|------------|------------|--------|----------|
| 15 | rs493971   | rs12594983 | 0.0260 | 2.64E-18 |
| 15 | rs493971   | rs7171473  | 0.0260 | 2.77E-18 |
| 15 | rs493971   | rs8031441  | 0.0260 | 2.81E-18 |
| 15 | rs493971   | rs7170819  | 0.0260 | 2.90E-18 |
| 15 | rs11072213 | rs2573613  | 0.0260 | 3.02E-18 |
| 15 | rs493971   | rs4965741  | 0.0260 | 3.14E-18 |
| 15 | rs493971   | rs4932444  | 0.0260 | 3.15E-18 |
| 15 | rs17555260 | rs6493620  | 0.0260 | 3.25E-18 |
| 15 | rs1269118  | rs11638393 | 0.0260 | 3.29E-18 |
| 15 | rs493971   | rs1966765  | 0.0259 | 3.35E-18 |
| 15 | rs493971   | rs12594008 | 0.0259 | 3.39E-18 |
| 15 | rs8034178  | rs7170320  | 0.0259 | 3.44E-18 |
| 15 | rs17762345 | rs12148198 | 0.0259 | 3.45E-18 |
| 15 | rs493971   | rs17791430 | 0.0259 | 3.46E-18 |
| 15 | rs12593847 | rs6494833  | 0.0259 | 3.56E-18 |
| 15 | rs493971   | rs2444234  | 0.0259 | 3.76E-18 |
| 15 | rs11633819 | rs8042430  | 0.0259 | 3.85E-18 |
| 15 | rs7164801  | rs2047223  | 0.0259 | 3.87E-18 |
| 15 | rs493971   | rs304939   | 0.0259 | 3.91E-18 |
| 15 | rs493971   | rs10152331 | 0.0259 | 3.91E-18 |
| 15 | rs493971   | rs7179692  | 0.0259 | 3.96E-18 |
| 15 | rs17443613 | rs1479817  | 0.0259 | 3.99E-18 |
| 15 | rs1648245  | rs8043067  | 0.0259 | 4.06E-18 |
| 15 | rs493971   | rs874955   | 0.0258 | 4.42E-18 |
| 15 | rs493971   | rs2652804  | 0.0258 | 4.56E-18 |
| 15 | rs493971   | rs7182577  | 0.0258 | 4.82E-18 |
| 15 | rs493971   | rs6494387  | 0.0257 | 5.61E-18 |
| 15 | rs493971   | rs937927   | 0.0257 | 5.69E-18 |
| 15 | rs493971   | rs896366   | 0.0257 | 5.81E-18 |
| 15 | rs493971   | rs7170093  | 0.0257 | 6.14E-18 |
| 15 | rs17235812 | rs7176517  | 0.0256 | 8.45E-18 |
| 15 | rs493971   | rs7172127  | 0.0254 | 1.16E-17 |
| 15 | rs493971   | rs12591682 | 0.0254 | 1.36E-17 |
| 15 | rs11070185 | rs12595405 | 0.0254 | 1.42E-17 |
| 15 | rs493971   | rs6494903  | 0.0253 | 1.82E-17 |
| 15 | rs493971   | rs2701419  | 0.0252 | 2.00E-17 |
| 15 | rs493971   | rs12914158 | 0.0252 | 2.01E-17 |
| 15 | rs17649891 | rs2059927  | 0.0252 | 2.41E-17 |
| 15 | rs493971   | rs11636063 | 0.0251 | 2.51E-17 |
| 15 | rs493971   | rs7168056  | 0.0250 | 3.85E-17 |
| 15 | rs493971   | rs12915892 | 0.0248 | 6.01E-17 |
| 15 | rs493971   | rs7181082  | 0.0237 | 9.66E-16 |



|    |            |           |        |          |
|----|------------|-----------|--------|----------|
| 15 | rs493971   | rs207954  | 0.0233 | 2.48E-15 |
| 18 | rs11876341 | rs7231241 | 0.0113 | 1.06E-02 |

SNP, single-nucleotide polymorphism; M.I., mutual information.
